# Supplementary material
Source: publisher site journal article supplement (https://www.spandidos-publications.com/4106/downloadSupplementary)

Figure S1. Effects of AZD6738 and 5-FU on viability of colon cancer cell lines. (A) HT29, SW480, DLD-1 and HCT116 cells were treated with the indicated concentrations of AZD6738 for 72 h, followed by a WST-1 assay. Data are presented as the means  $\pm$  SD (n=6). \*P<0.05 vs. 0  $\mu$ M AZD6738. (B) HT29, SW480, DLD-1 and HCT116 cells were treated with the indicated concentrations of 5-FU for 72 h, followed by a WST-1 assay. Data are presented as the mean  $\pm$  SD (n=6). \*P<0.05 vs. 0  $\mu$ M 5-FU. 5-FU, 5-fluorouracil; OD, optical density; WST-1, water-soluble tetrazolium 1.

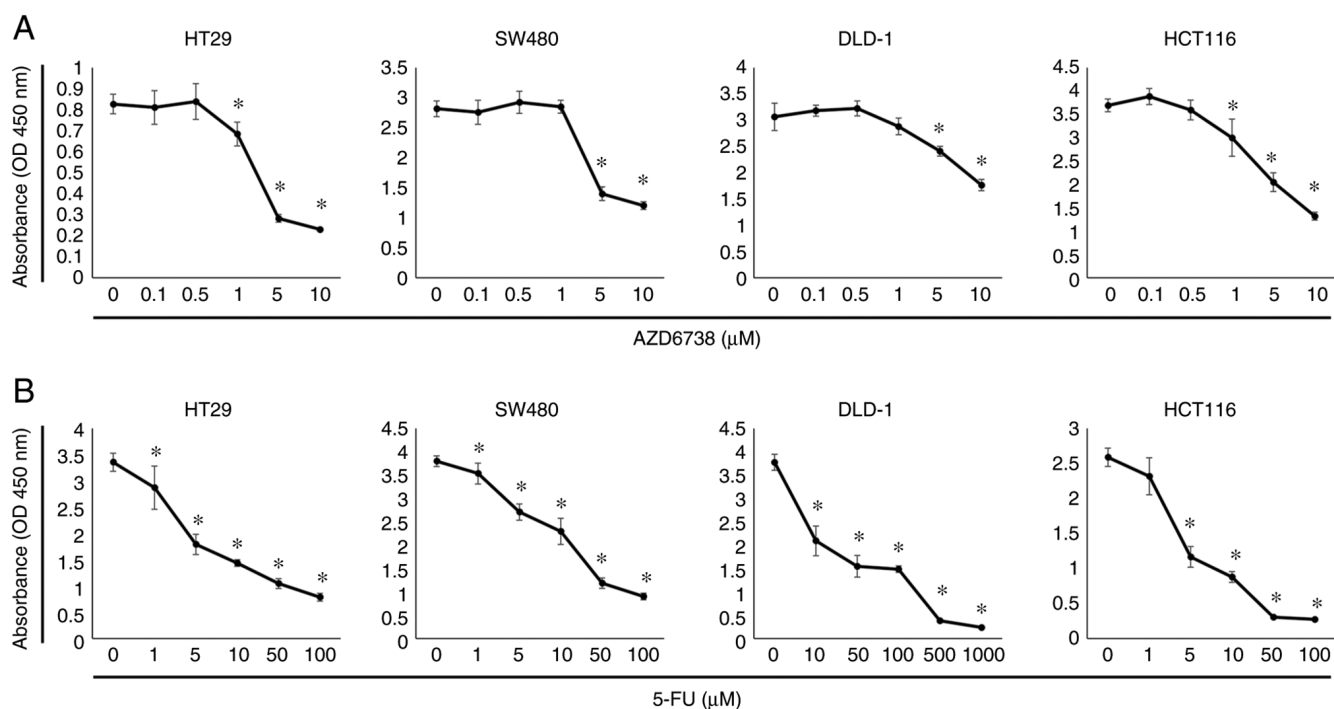

Figure S2. AZD6738 treatment in a HT29 xenograft mouse model. (A) Xenograft tumor volume was measured after various treatments (control and AZD6738). There were no statistically significant differences between the two groups (n=5). (B) Images of excised tumors.

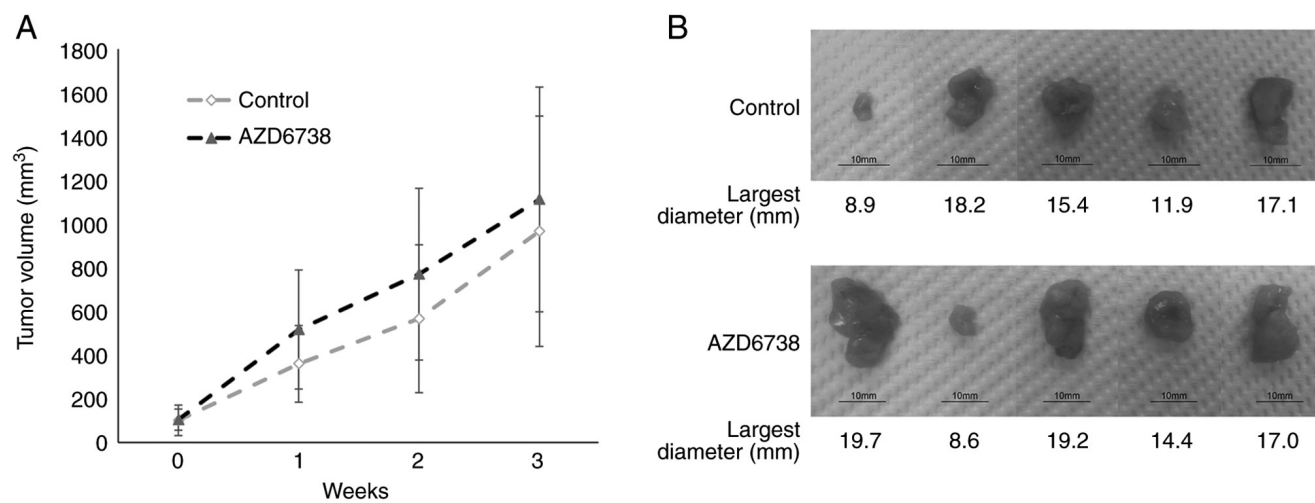

Supplement: Supplementary file 1 [file downloadSupplementary]
